# Supplementary material
Source: Springer Nature journal article supplement (https://www.springerprofessional.de/resource/supplementary/13638_2013_883_MOESM3_ESM.pdf/11899134)
Supplement: MOESM3 [file 11899134]

# WAVE Applications (IEEE 1609.1)

WSMP  
(WAVE Short Message  
Protocol)

TCP/UDP

IPv6

LLC

802.11p / WAVE MAC

Multi-  
channel  
Operation

802.11p / WAVE PHY

WME (WAVE Management Entity)

MLME  
(MAC Layer ME)

PLME  
(Physical Layer ME)
